# Supplementary material
Source: publisher figshare collection journal article supplement (https://frontiersin.figshare.com/ndownloader/files/20733969)

**Supplementary Figure 1.** Representative pH calibration curve used to transform fluorescence intensity (F0) ratios into intracellular pH values.

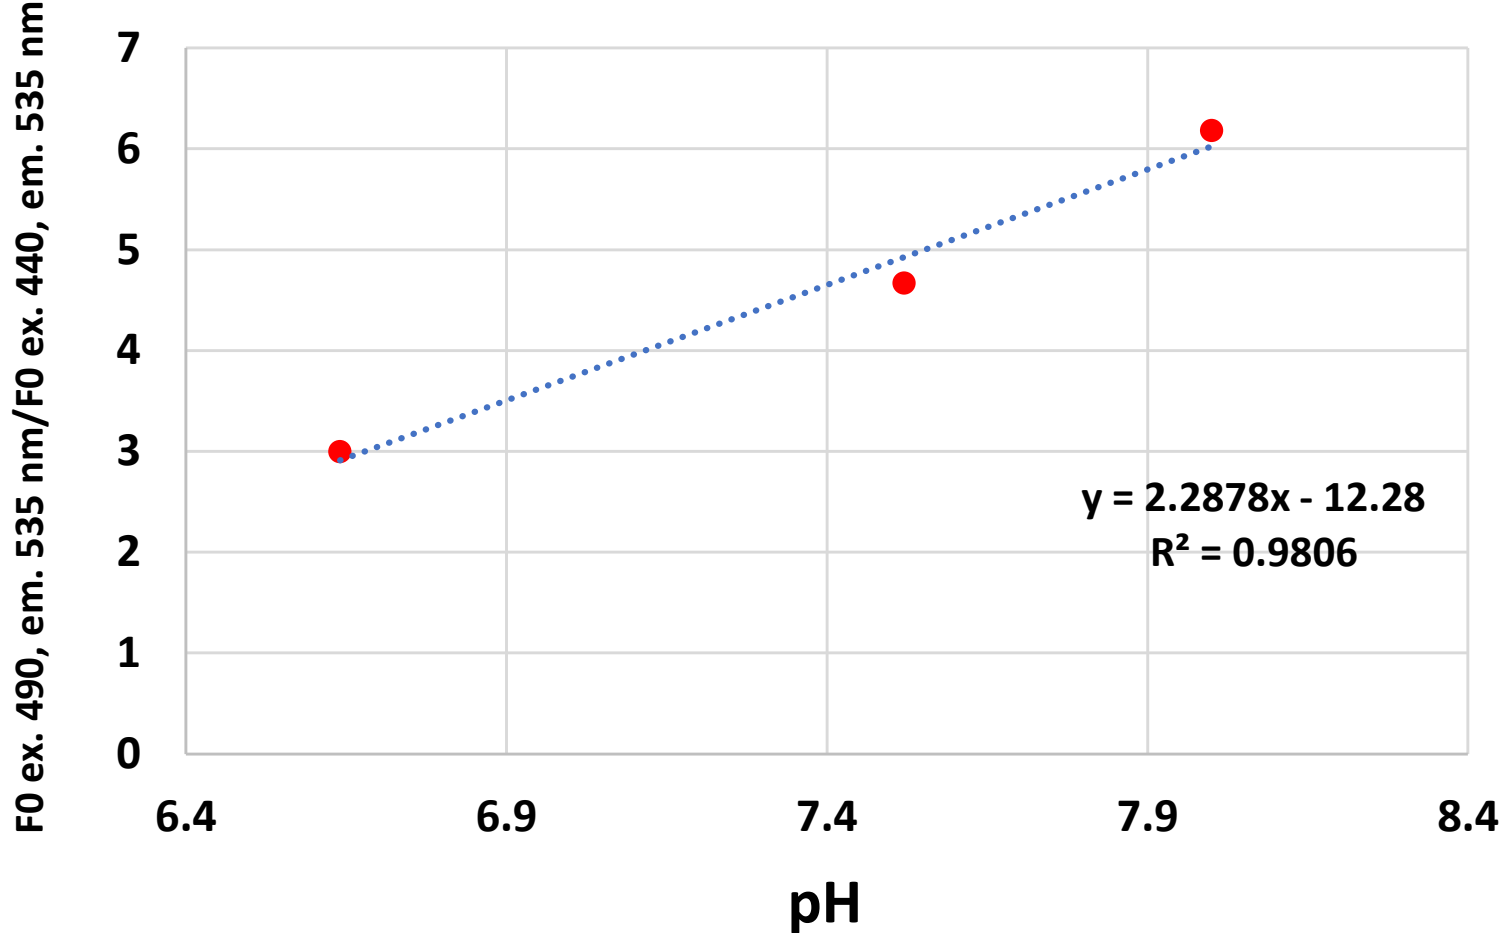

Supplement: Supplementary file 1 [file 20733969]
